1 **Title: A comprehensive list of the replication promoters of *Bunyavirales* reveals a**  
2 **unique promoter structure in *Nairoviridae* differing from other virus families**

3

4 **Authors:**

5 Yutaro Neriya<sup>1</sup>, Shohei Kojima<sup>2</sup>, Arata Sakiyama<sup>3</sup>, Mai Kishimoto<sup>4</sup>, Takao Iketani<sup>5</sup>,  
6 Tadashi Watanabe<sup>6</sup>, Yuichi Abe<sup>7</sup>, Hiroshi Shimoda<sup>8</sup>, Keisuke Nakagawa<sup>9</sup>, Takaaki  
7 Koma<sup>10</sup>, Yusuke Matsumoto<sup>11</sup> #

8

9 **Affiliations:**

10 <sup>1</sup> School of Agriculture, Utsunomiya University, 350 Mine-machi, Utsunomiya, Tochigi,  
11 321-8505, Japan.

12 E-mail: [neriya@cc.utsunomiya-u.ac.jp](mailto:neriya@cc.utsunomiya-u.ac.jp)

13

14 <sup>2</sup> Genome Immunobiology RIKEN Hakubi Research Team, RIKEN Center for  
15 Integrative Medical Sciences, 1-7-22 Suehiro-cho, Tsurumi-ku, Yokohama, Kanagawa  
16 230-0045, Japan.

17 E-mail: [shohei.kojima@riken.jp](mailto:shohei.kojima@riken.jp)

18

19 <sup>3</sup> Department of Bacteriology, Osaka City University, Graduate School of Medicine,  
20 1-4-3, Asahi-machi, Abeno-ku, Osaka 545-8585, Japan.

21 E-mail: [sakiyama.arata@med.osaka-cu.ac.jp](mailto:sakiyama.arata@med.osaka-cu.ac.jp)

22

23 <sup>4</sup> Division of Molecular Pathobiology, International Institute for Zoonosis Control,  
24 Hokkaido University, North 20, West 10 Kita-ku, Sapporo 001-0020, Japan.

25 E-mail: [kishimoto@czc.hokudai.ac.jp](mailto:kishimoto@czc.hokudai.ac.jp)

26

27 <sup>5</sup> Laboratory of Pathogenesis of Viral Infectious Diseases, Tokyo University of  
28 Agriculture and Technology, 3-8-1 Saiwai-chou, Fuchu, Tokyo 183-8509, Japan

29 E-mail: s215715r@st.go.tuat.ac.jp

30

31 <sup>6</sup> Department of Virology, Graduate school of medicine, University of the Ryukyus,  
32 Uehara 207, Nishihara-cho, Nakagami-gun, Okinawa 903-0215, Japan.

33 E-mail: twatanab@med.u-ryukyu.ac.jp

34

35 <sup>7</sup> Division of Molecular Diagnostics, Aichi Cancer Center Research Institute, 1-1,  
36 Kanokoden, Chikusa-ku, Nagoya, 464-8681, Japan.

37 E-mail: y.abe@aichi-cc.jp

38

39 <sup>8</sup> Laboratory of Veterinary Microbiology, Joint Faculty of Veterinary Medicine,  
40 Yamaguchi University, 1677-1 Yoshida, Yamaguchi, 753-8515, Japan.

41 E-mail: hshimoda@yamaguchi-u.ac.jp

42

43 <sup>9</sup> Laboratory of Veterinary Microbiology, Joint Department of Veterinary Medicine,  
44 Faculty of Applied Biological Sciences, Gifu University, 1-1 Yanagido, Gifu, 501-1193,  
45 Japan.

46 E-mail: nkgwk@gifu-u.ac.jp

47

48 <sup>10</sup> Department of Microbiology, Tokushima University Graduate School of Biomedical  
49 Sciences, 3-18-15 Kuramoto, Tokushima, 770-8503, Japan.

50 E-mail: tkoma@tokushima-u.ac.jp

51

52 <sup>11</sup> Department of Microbiology and Cell Biology, Tokyo Metropolitan Institute of  
53 Medical Science, 2-1-6 Kamikitazawa, Setagaya-ku, Tokyo 156-8506, Japan.

54 E-mail: matsumoto-ys@igakuken.or.jp

55 #Author to whom correspondence should be addressed.

56

57 **Abstract**

58 Bunyaviruses belong to the order *Bunyavirales*, the largest group of RNA viruses. They  
59 infect a wide variety of host species around the world, including plants, animals and  
60 humans, and pose a major threat to public health. Major families in the order  
61 *Bunyavirales* have tri-segmented negative-sense RNA genomes, the 5' and 3' ends of  
62 which form complementary strands that serve as a replication promoter. Elucidation of  
63 the mechanisms by which viral RNA-dependent RNA polymerase recognizes the  
64 promoter to initiate RNA synthesis is important for understanding viral replication and  
65 pathogenesis, and for developing antivirals. A list of replication promoter configuration  
66 patterns may provide details on the differences in the replication mechanisms among  
67 bunyaviruses. Here, by using public sequence data of all known bunyavirus species, we  
68 constructed a comprehensive list of the replication promoters comprising 40 nucleotides  
69 in both the 5' and 3' ends of the genome that form a specific complementary strand. We  
70 showed that among tri-segmented bunyaviruses, viruses belonging to the family  
71 *Nairoviridae*, including the highly pathogenic Crimean-Congo hemorrhagic fever virus,  
72 have evolved a GC-rich promoter structure that differs from that of other bunyaviruses.  
73 The unique promoter structure might be related to the large genome size of the family  
74 *Nairoviridae* among bunyaviruses. It is possible that the large genome architecture  
75 confers a pathogenic advantage. The promoter list provided in this report is expected to  
76 be useful for predicting virus family-specific replication mechanisms of segmented  
77 negative-sense RNA viruses.

78

## 79 **Introduction**

80 *Bunyavirales* is a new order that was recently proposed by the International  
81 Committee on Taxonomy of Viruses (ICTV). It consists of 12 families of closely related  
82 viruses: *Arenaviridae*, *Cruliviridae*, *Fimoviridae*, *Hantaviridae*, *Leishbuviridae*,  
83 *Myoviridae*, *Nairoviridae*, *Peribunyaviridae*, *Phasmaviridae*, *Phenuiviridae*,  
84 *Tospoviridae*, and *Wupedeviridae*. Members of *Bunyavirales* have a segmented  
85 single-stranded negative-sense or ambisense RNA genome (1,2). The families  
86 *Arenaviridae*, *Hantaviridae*, *Nairoviridae*, *Peribunyaviridae*, and *Phenuiviridae* include  
87 several important pathogens that can cause severe diseases in animals, including  
88 humans, while the families *Fimoviridae*, *Phasmaviridae*, *Phenuiviridae*, and  
89 *Tospoviridae* include pathogens associated with plant diseases.

90 Major groups of bunyaviruses possess tri-segmented negative-sense RNA  
91 genomes, and share the same genetic organization consisting of three segments, *i.e.*, the  
92 small (S), medium (M), and large (L) segments, based on their relative sizes. Each  
93 segment acts as a template for the replication of a positive-sense antigenome, and for  
94 the transcription of mRNA. The S segment encodes the nucleocapsid protein (NP), the  
95 M segment encodes a glycosylated polyprotein precursor (GPC) that is cleaved into  
96 envelope spike proteins Gn and Gc, and the L segment encodes the L protein, an  
97 RNA-dependent RNA polymerase (RdRp) responsible for the transcription and  
98 replication of the three RNA segments. The RNA synthesis activities of the three RNA  
99 segments are regulated by nucleotide (nt) sequences within the 3' and 5' untranslated  
100 regions (UTRs), which flank the S, M, and L open reading frames. The terminal nts of  
101 3' and 5' UTRs exhibit complementarily, and such sequences have been shown to bind  
102 to, and influence the activity of, viral RdRp, promoting transcription to yield a  
103 5'-capped mRNA by using cleaved host mRNA as a primer, and replication that results  
104 in the synthesis of a full-length copy of the genome template.

105 Bunyavirus promoters are composed of two promoter elements, *i.e.*, promoter  
106 element 1 (PE1), the genomic extreme complement region, and PE2, the complement

107 region located behind PE1, which was first described in Bunyamwera virus (BUNV) of  
108 the family *Peribunyaviridae* (3,4). PE1 comprises approximately 10 to 15 nts located at  
109 the extreme termini of the genome that are strictly conserved among all three segments.  
110 These nts have been shown to interact with L protein at separate sites in La Crosse virus  
111 (LACV) of the family *Peribunyaviridae* (5,6). PE2 comprises segment-specific nts at  
112 subsequent positions that are required to form canonical Watson-Crick base-pairing  
113 with corresponding nts at the opposite end of the template (3,4,7). These RdRp-RNA  
114 and RNA-RNA interactions are thought to account for the pseudocircular form of viral  
115 ribonucleoprotein complexes (8,9). In BUNV, sequence changes within PE1 have a  
116 significant effect on promoter function, but adjacent nts within PE2 are highly resistant  
117 to sequence changes, provided that their interterminal Watson-Crick base-pairing  
118 potential is maintained (3). For the family *Nairoviridae*, little is known on the roles of  
119 the 3'- and 5'-terminal UTRs in regulating RNA synthesis. As with other *Bunyavirales*  
120 members, the UTRs of all nairoviruses comprise highly conserved terminal proximal nts  
121 (PE1) shared by all three segments, followed by less conserved regions that are  
122 segment-specific nts (PE2). The importance of these segment-specific nts in RNA  
123 synthesis has been partially examined using a minigenome reporter assay in  
124 non-pathogenic *Hazara orthonairovirus* (HAZV), which is closely related to  
125 Crimean-Congo hemorrhagic fever virus (CCHFV) (10). PE1 and PE2 were found to be  
126 separated by a spacer region, which exhibited a critical requirement to be short in length  
127 and lack base-pairing ability. Taken together, the accumulated data indicate that the  
128 promoter structure of bunyaviruses differs among virus families. Understanding of these  
129 properties may be critical for developing antivirals targeting viral RNA synthesis and  
130 processing.

131 To characterize the promoter structure of diverse bunyaviruses, we constructed a  
132 list of all viral promoters that exhibit complementarity and each nt counts within the  
133 first 40 nts of both the 5' and 3' (anti)genomic ends. We found that the promoters of the

134 family *Nairoviridae* differ from those of other virus families, and have characteristics  
135 unique to the family, which has a large genome size.

## 136 **Results**

### 137 **Construction of the list of promoters in the order *Bunyvirales***

138 This study aimed to characterize the promoter structure of all virus species in the  
139 order *Bunyvirales*, including the families *Arenaviridae*, *Cruliviridae*, *Fimoviridae*,  
140 *Hantaviridae*, *Leishbuviridae*, *Mypoviridae*, *Nairoviridae*, *Peribunyaviridae*,  
141 *Phasmaviridae*, *Phenuiviridae*, *Tospoviridae*, and *Wupedeviridae*, which are  
142 tri-segmented or multi-segmented viruses, as summarized in Figure 1. The  
143 complementarity of the 5' and 3' extreme 40 nts of the genomic ends of virus genomes  
144 registered in the ICTV list was analyzed. Because there are incomplete genome  
145 sequences in the National Center for Biotechnology Information (NCBI) database that  
146 do not precisely cover the genome extremes, we selected viral sequences with complete  
147 complementarity in the terminal +1 to +3 nts (some exceptions with  
148 non-complementary +1 nt are included). The complement structure of 5' and 3' genomic  
149 ends (positive-sense form) as well as the genome length, counts of G:C/A:U  
150 complementarity, and counts of each nts (A, U, G and C) in the promoter region were  
151 calculated by using an automatic calculating system based on an Excel file  
152 (Supplementary Table 1), and the results are tabulated in Supplementary Table 2. A  
153 dataset was generated for each virus species that had complete data for all segments,  
154 including: tri-segmented bunyaviruses *Arenaviridae* (2 species), *Cruliviridae* (3 species),  
155 *Hantaviridae* (24 species), *Mypoviridae* (1 species), *Nairoviridae* (20 species),  
156 *Peribunyaviridae* (56 species), *Phasmaviridae* (2 species), *Phenuiviridae* (47 species),  
157 *Tospoviridae* (19 species) and *Wupedeviridae* (1 species); multi-segmented  
158 bunyaviruses *Fimoviridae* (17 species) and *Phenuiviridae* (14 species); and  
159 di-segmented bunyavirus *Arenaviridae* (23 species; characterized in Supplementary  
160 Figure 1).

### 161 **Characteristics of the replication promoters of five major virus families**

162 For five major tri-segmented virus families, *i.e.*, *Peribunyaviridae*, *Phenuiviridae*,  
163 *Tospoviridae*, *Hantaviridae*, and *Nairoviridae*, we examined the conservation of the nts  
164 in the 40 nts at the promoter region using the sequence generator [WebLogo](#) (Figure 2A,  
165 which shows representative M segments, and Supplementary Figures 2 and 3). The  
166 promoters differed among viruses: the initial nt was adenosine (A) in *Peribunyaviridae*,  
167 *Phenuiviridae* and *Tospoviridae*, and was uridine (U) in *Hantaviridae* and *Nairoviridae*.  
168 These promoters were further categorized into those starting with a tri-nt repeat  
169 (5'-AGUAGU and 5'-UAGUAG) and those starting with a di-nt repeat (5'-ACAC,  
170 5'-AGAG and 5'-UCUC) (Figure 2A and B). We next examined the percentages of G:C  
171 and A:U complementarity at every nt position in the promoter region among the virus  
172 species in each virus family (Figure 2A). The complementarity conformation was  
173 remarkably different among virus families. G:C complementarity was relatively higher  
174 in the virus genomes with a promoter starting with U than in those with a promoter  
175 starting with A. The genomes of the families *Hantaviridae* and *Nairoviridae* contain  
176 high G:C complementarity at the 13- to 16-nt and 17- to 21-nt positions, respectively. In  
177 some viruses belonging to the family *Phenuiviridae*, a shift of 1 nt at the 10th position  
178 from the 5' extreme appeared to increase the complementarity of the subsequent 5' and  
179 3' ends (11), but it did not increase the total G:C complementarity frequency in the  
180 promoter region of *Phenuiviridae* (data not shown). It has been reported that HAZV has  
181 a promoter composed of two complementary regions of PE1 and PE2 separated by a  
182 spacer region formed by non-complementary sequences at the 13- to 16-nt position (10).  
183 We found the same feature in most virus species of the *Nairoviridae* family (Figure 2  
184 and Supplementary Figure 3).

185 To analyze the promoter structure in more depth, the G:C and A:U  
186 complementarity in the 40-nt promoter region was determined in three segments of the  
187 five virus families. The average complementarity count of virus species in each virus  
188 family is shown in Figure 3A. The A:U complementarity counts were higher than the  
189 G:C complementarity counts in all segments for all virus families. However, G:C

190 complementarity was particularly higher in the promoters of the family *Nairoviridae*  
191 than in those of other virus families (Figure 3A). Each nt (A, U, G, and C) in the  
192 promoter region was counted, and the average value within each virus family is shown  
193 in Figure 3B. In *Phenuiviridae*, *Tospoviridae*, and *Hantaviridae*, A in the 5' end and U  
194 in the 3' end were frequent in all segments. In *Peribunyaviridae*, both A and U were  
195 abundant at the 5' and 3' ends. In contrast, in the family *Nairoviridae*, C and G were  
196 more frequent at the 5' and 3' ends, respectively, than in other virus families. We  
197 demonstrated that the family *Nairoviridae* had more G:C complementarity as well as  
198 higher G/C counts in the 40 nts of the promoter region than other virus families, which  
199 is suggestive of stronger affinity for base pairing at both genomic ends.

#### 200 **Genome length of virus families in order *Bunyavirales***

201 The promoter structure of *Nairoviridae* differed from that of other tri-segmented  
202 virus families in that it had high G:C complementarity and a non-complementary nt  
203 spacer region. To investigate the relationship between these features and the  
204 characteristics of the viral genomes, the genome lengths of all viral species of the five  
205 virus families were studied. Figure 4A shows the average total genome length  
206 (combined length of the L, M, and S segments) of all virus species in the five virus  
207 families. The full genome lengths of families *Peribunyaviridae*, *Phenuiviridae*, and  
208 *Hantaviridae* were comparable, while the genome length of family *Tospoviridae* was  
209 larger, and that of family *Nairoviridae* was the largest. The length of each segment was  
210 also examined in all virus species, and the average lengths within virus families are  
211 shown in Figure 4B. Family *Tospoviridae* had relatively large L, M, and S segments.  
212 The L segment of *Nairoviridae* was the largest among all segments of all virus families.

#### 213 **Genome length of virus species in family *Nairoviridae***

214 Among tri-segmented viruses belonging to the order *Bunyavirales*, only the  
215 family *Nairoviridae* includes highly pathogenic viruses categorized as biosafety level  
216 (BSL)-4 pathogens that cause hemorrhagic fever in humans, such as CCHFV (12). We  
217 hypothesized that the high pathogenicity of this virus family in mammals may be related



218 to its large genome size. We examined the length of the available sequences annotated  
219 to “*Nairoviridae*” in the NCBI database. We first selected virus genome sequences  
220 possessing 5'-UCUC---GAGA-3' ends, which are the most conserved genomic end  
221 sequences in nairoviruses, in the L, M and S segments. The lengths of these sequences  
222 are shown in Figure 5A. The family *Nairoviridae* contains two highly pathogenic  
223 viruses in mammals, *i.e.*, CCHFV and Nairobi sheep disease virus (NSDV), which have  
224 a mortality rate of 30% and 90% in humans and small ruminants, respectively (13,14).  
225 The sequences of CCHFV and NSDV are shown in red and yellow bars in the graph,  
226 respectively (Figure 5A). The lengths of M segment of CCHFV and NSDV were all  
227 categorized in the largest group among virus genome sequences possessing  
228 5'-UCUC---GAGA-3' ends.

229

## 230 Discussion

231 In this study, we tabulated the replication promoter structures of all known virus  
232 species in the order *Bunyavirales*. Our analysis focused on five major tri-segmented  
233 virus families, and the results indicated that the genomes can be divided into two  
234 categories: those with a promoter starting with A (families *Peribunyaviridae*,  
235 *Phenuiviridae*, and *Tospoviridae*) and those with a promoter starting with U (families  
236 *Hantaviridae* and *Nairoviridae*; Figure 2). Viral RNA polymerases have been shown to  
237 be able to initiate RNA synthesis with a purine (G or A), but not with a pyrimidine (U  
238 or C) (15). Therefore, the 5'-U genomic end of *Hantaviridae* and *Nairoviridae* is  
239 unconventional. The genomes of LACV and Rift Valley fever virus (RVFV) of the  
240 families *Peribunyaviridae* and *Phenuiviridae*, respectively, contain a 5'-triphosphate  
241 end that starts with A (5'-pppA) (16,17). The 5'-pppA is generated by viral RdRp that  
242 recognizes the opposite U as the template. As seen in several segmented and  
243 non-segmented RNA viral polymerases (18-20), bunyaviral RdRp synthesizes RNA  
244 from an internal nt, and not from the terminus of the template. In LACV, RNA  
245 synthesis is initiated with A using the U at the +4 position of the antigenome

246 (3'-UCAUCA) as the template during genome replication (9). The elongated product,  
247 5'-pppAGU, is realigned to the +1 to +3 position of the antigenome template  
248 (3'-UCAUCA), and is further elongated to generate 5'-pppAGUAGU. Accordingly, the  
249 position of U responsible for RNA synthesis initiation is presumably the +3 position in  
250 the *Phenuiviridae* (3'-UGUG) and *Tospoviridae* (3'-UCUC) antigenomes. This indicates  
251 that the 5'-pppAC and 5'-pppAG products realign to the 3'-UGUG and 3'-UCUC of the  
252 antigenomes, respectively, and are further elongated to generate 5'-pppACAC and  
253 5'-pppAGAG, respectively, which are precise complementary chains of the antigenome  
254 templates. In contrast, the genomes of Hantaan virus (HTNV) in the family  
255 *Hantaviridae*, and CCHFV in the family *Nairoviridae* contain a 5'-monophosphate end  
256 (16,21), suggesting an unconventional RNA processing event during replication. In  
257 HTNV, RNA synthesis is initiated with an internal G at the +3 position by using a C of  
258 the 3'-AUCAUC of the antigenome as the template (21). Subsequently, the elongated  
259 5'-pppGUA product realigns to the 3'-AUCAUC to further produce 5'-pppGUAGUA.  
260 Then, the extreme 5'-pppG is removed by an endoribonuclease activity of viral RdRp to  
261 produce 5'-pUAGUA (5'-monophosphate end) (21). The endoribonuclease activity of  
262 RdRp is responsible for the cap snatching that cleaves the 5' end of the host mRNA for  
263 use as a transcription primer (22). The -1 position of viral mRNA of HTNV is G,  
264 indicating that viral RdRp can cleave host mRNA after the G nt (cleave GpN to produce  
265 G/pN) during transcription. In *Nairoviridae*, the -1 position of viral mRNA is C (23,24),  
266 and it is also generated via the cap-snatching mechanism. Similar to the RNA synthesis  
267 in *Hantaviridae*, it is supposed that nairoviral RNA synthesis is internally initiated with  
268 5'-pppC at the +2 position by using the G of 3'-AGA of the antigenome as the template.  
269 Subsequently, the 5'-pppCU product would realign to the 3'-AGA, and be further  
270 elongated to generate 5'-pppCUCU. The 5'-pppC would then be removed, resulting in  
271 the production of a 5'-monophosphate end. Therefore, although the hantaviral RdRp is a  
272 conventional enzyme that initiates RNA synthesis with a purine (G), the nairoviral  
273 RdRp is considered to be an unconventional enzyme that can initiate with a pyrimidine

274 (C). Such a difference may be important for the targeting of novel antivirals specific for  
275 nairoviral diseases.

276 Our analysis additionally confirmed that most bunyaviral genomes begin with a  
277 di-or tri-nt repeat (Figure 2), which has been suggested previously (21,25). The repeats  
278 can determine the initiation site for RdRp (*e.g.*, +2 in *Nairoviridae*, +3 in *Hantaviridae*,  
279 *Phenuiviridae* and *Tospoviridae*, and +4 in *Peribunyaviridae*), which is important for  
280 the prime-realign RNA synthesis mechanism. The biological significance of the internal  
281 position of RNA synthesis initiation is unclear. It is likely that the di-nt repeat is  
282 restricted to virus families possessing an ambisense genome, such as *Phenuiviridae* and  
283 *Tospoviridae*, as well as *Nairoviridae* (for which only CCHFV has been reported) (26).  
284 This suggests that the ambisense coding property may be related to the di-nt repetition  
285 in the genomic ends. If this is true, analysis of genomic end repetition patterns may  
286 enable the elucidation of new transcripts in various bunyaviral genomes.

287 The *Nairoviridae* promoter appears to have high G:C complementarity in the 17  
288 to 21-nts region (Figure 2A and Supplementary Figure 2), and this likely reflects the  
289 high G:C complementarity rate at the promoter region (Figure 3A). Interestingly, this  
290 GC-rich dsRNA region is located after a spacer region composed of  
291 non-complementary bases around the 14th position in all three segments, as has been  
292 reported previously in HAZV and CCHFV (10,27). We have previously suggested the  
293 possibility that the HAZV polymerase can recognize this GC-rich dsRNA as a promoter  
294 element essential for RNA synthesis initiation via an unidentified domain of the L  
295 protein (10). This kind of specific protein-RNA interaction has been proposed to be a  
296 suitable target for antivirals against CCHFV, which is closely related to HAZV. Our  
297 comprehensive analysis of the promoter list also suggested that this kind of strategy  
298 may be applicable for all viruses belonging to the *Nairoviridae* family.

299 In bunyaviruses, genome replication in each segment is regulated by the  
300 segment-specific promoter strength, but the variations in nts (A, U, G, and C) in each  
301 promoter region do not differ significantly among the L, M, and S segments in all virus

302 families, except for *Nairoviridae* (Figure 3B). It is possible that the promoter strength  
303 among segments is determined by slight differences in the promoter structure that do  
304 not affect the total complementarity counts or nt variations. Viruses in the family  
305 *Phenuiviridae* and CCHFV of the family *Nairoviridae* have an ambisense S segment,  
306 but there is no nt variation pattern in the promoter that is unique to the S segment  
307 (Figure 2B). This suggests that the nt variation in the promoter was not affected by the  
308 presence of the ambisense segment during the viral evolution process. On the other  
309 hand, the nt variation in the promoter of the nairoviral L segment was different from  
310 that of the M and S segments, *i.e.*, it was observed to have less G and C at the 5' and 3'  
311 ends, respectively (Figure 2B). The nairoviral L segment is remarkably long when  
312 compared to other nairoviral segments and the genomes of other virus families (Figure  
313 4B). This large genome size may be associated with the promoter structure.

314 It remains unclear why the genome of the family *Nairoviridae* is so large.  
315 *Nairoviridae* is the only tri-segmented virus family that includes hemorrhagic fever  
316 viruses classified as BSL-4 pathogens, such as CCHFV. We hypothesized that the large  
317 genome size of the family *Nairoviridae* may be related to its high pathogenesis in  
318 mammals. Although the length of the L segment in *Nairoviridae* is the longest among  
319 all bunyaviruses, it is not particularly long among the highly pathogenic viruses in this  
320 family (Figure 5A). Rather, our analysis confirmed that among viruses in the family  
321 *Nairoviridae*, the M segment is the largest segment in two highly pathogenic viruses in  
322 mammals, CCHFV and NSDV, suggesting that the M segment contains factors  
323 involved in viral pathogenesis. The M segment encodes GPC that is first translated as a  
324 polyprotein from mRNA, and further cleaved into Gn, Gc, and other accessory or  
325 uncharacterized proteins. A schematic diagram of several representative nairovirus  
326 GPCs is shown in Figure 5B. GPC contains an N-terminal signal peptide and multiple  
327 membrane-spanning domains, and is processed by signal peptidases to generate an  
328 N-terminal pre-Gn protein, C-terminal pre-Gc protein, and a  
329 double-membrane-spanning NSm protein. The pre-Gn and pre-Gc are subsequently

330 processed by furin-like or subtilisin kexin isozyme-1 proteases to generate a mucin-like  
331 protein containing a large number of *O*-glycosylation sites, a protein designated as  
332 GP38 (-like), virion envelope glycoprotein Gn, and virion envelope glycoprotein Gc  
333 (28). We showed that although the sizes of Gn and Gc are similar among virus species,  
334 those of the *O*-glycosylation sites and GP38-like protein are different; in particular, they  
335 are larger in CCHFV and NSDV (Figure 5B). This suggests that these regions may be  
336 determinants of the pathogenicity of *Nairoviridae*. It has been proposed that GP38 is  
337 involved in CCHFV particle formation and viral infectivity (28). Analysis of  
338 convalescent patient sera showed high titers of CCHFV GP38 antibodies, which  
339 indicated the immunogenicity of this protein in humans during natural CCHFV  
340 infection. In a mouse model, an antibody against GP38 could protect the animals from a  
341 heterologous CCHFV challenge, indicating an association between GP38 and the high  
342 pathogenesis of CCHFV (29). Our present analysis indicates that there is an association  
343 between the N-terminal GPC region and viral pathogenesis not only in CCHFV, but  
344 also in other highly pathogenic nairoviruses, including NSDV.

345 In conclusion, we constructed a comprehensive list of the promoters in  
346 *Bunyavirales* that included all virus families in this order. Studies on the RNA synthesis  
347 mechanism of *Bunyavirales* have been limited to only a few virus species. Analysis of  
348 the conservation in all promoter structures is useful for the prediction of RNA synthesis  
349 mechanisms in uncharacterized and newly identified bunyaviruses. The automatic  
350 promoter-characterizing system (Supplementary Table 1) is applicable for all  
351 bunyaviruses for which the precise genomic end sequences are known.

352

## 353 **Methods**

### 354 **List of bunyavirus promoters**

355 In total, 590 bunyavirus species were registered in the ICTV list  
356 (<https://talk.ictvonline.org/>) on December 7th, 2021. The complete sequences of the L,  
357 M and S segments of bunyaviruses available on the NCBI associated with the GenBank

358 accession numbers listed in Supplementary Table 2 were used for the analysis. After  
359 obtaining the full-length genome sequences, the sequences were input to the "Sequence"  
360 column in Supplementary Table 1, and the extreme 40 nts of each of the 5' and 3' ends,  
361 the complementarity between the 5' and 3' ends of the sequences, and the counts of G:C  
362 and A:U complementarity and each of the nts (A, U, G, and C) in the promoter region  
363 were calculated automatically. In Supplementary Table 1, the results of the L segments  
364 were input as representative. Conservation of the nts in the promoter was analyzed by  
365 using the sequence logo generator WebLogo (<https://weblogo.berkeley.edu/logo.cgi>).

### 366 **Analysis of the genome length of nairoviruses**

367 Sequences annotated as "*Nairoviridae*" were downloaded from the NCBI refseq  
368 database on January 16th, 2022. There were 5,272 *Nairoviridae* sequences in the  
369 database. We first checked for the presence of the extreme promoter sequence  
370 5'-UCUCA in the 8-nt ends of the sequences. The promoter sequence was present in  
371 both ends of 368 *Nairoviridae* sequences (Supplementary Table 3), and the lengths of  
372 these sequences were calculated using a custom Python script. The codes used for this  
373 analysis is available on GitHub  
374 ([https://github.com/shohei-kojima/Arenaviridae\\_overhang\\_analysis\\_2022](https://github.com/shohei-kojima/Arenaviridae_overhang_analysis_2022)).

### 375 **Amino acid sequence map of the nairovirus glycoprotein**

376 The structural characteristics of the nairovirus glycoprotein were predicted using  
377 TMHMM-2.0 for the transmembrane protein (30), SignalP-6.0 for the signal cleavage  
378 site (31), and NetOGlyc-4.0 for the O-linked glycosylation sites (32). Data on the  
379 glycoprotein sequences were collected from UniProt  
380 (<https://www.ebi.ac.uk/uniprot/index>). The UniProt accession numbers were: CCHFV,  
381 Q8JSZ3; NSDV, A0A0A7H811; Dugbe virus, Q02004; Tofla virus, A0A0U5AG15;  
382 HAZV, A6XIP3; and Erve virus, J3S7E1. GP38-like regions were found using the  
383 Protein Basic Local Alignment Search Tool (BLASTp) based on the amino acid  
384 sequences of the CCHFV and Dugbe virus GPC.

### 385 **Statistical analysis**

386           Statistical analyses were performed with Prism software (version 9.1.2; GraphPad,  
387 San Diego, CA, USA). Statistical significance was assigned when p values were <0.05.  
388 Inferential statistical analysis was performed by a two-tailed unpaired Student's *t*-test or  
389 one-way analysis of variance (ANOVA) followed by Tukey's test, as appropriate.

390

391

392

### 393 **Funding**

394           This work was supported by Takeda Science Foundation, and Tokyo Biochemical  
395 Foundation, Japan (to Y.M.).

396

### 397 **Author contributions**

398           Y.N., S.K., A.S., M.K., T.I., T.W., Y.A., H.S., K.N., T.K. and Y.M. conceived  
399 and designed the study, performed the analyses, analyzed the data. Y.N. generated the  
400 automatic promotor calculator (Supplementary Table 1). S.K performed the genome  
401 length analysis of *Nairoviridae*. A.S. designed the schematic diagram of nairovirus GPC.  
402 Y.M. wrote the manuscript. All authors have read and agreed to the manuscript.

403

### 404 **Competing interests**

405           The authors declare no competing interests.

406

407 **References**

- 408 1. Ren F, Shen S, Wang Q, Wei G, Huang C, Wang H, Ning YJ, Zhang DY, Deng F.  
409 Recent advances in Bunyavirus reverse genetics research: systems development,  
410 applications, and future perspectives. *Front Microbiol.* 12:771934. 2021
- 411 2. Kuhn JH, Adkins S, Agwanda BR, Al Kubrusli R, Alkhovsky SV, Amarasinghe  
412 GK, et al. Taxonomic update of phylum Negarnaviricota (Riboviria:  
413 Orthornavirae), including the large orders Bunyavirales and Mononegavirales.  
414 *Arch Virol.* 166:3513–66. 2021.
- 415 3. Barr JN, Wertz GW. Bunyamwera Bunyavirus RNA Synthesis Requires  
416 Cooperation of 3'- and 5'-Terminal Sequences. *J Virol.* 78:1129-38. 2004.
- 417 4. Kohl A, Dunn EF, Lowen AC, Elliott RM. Complementarity, sequence and  
418 structural elements within the 3' and 5' non-coding regions of the Bunyamwera  
419 orthobunyavirus S segment determine promoter strength. *J Gen Virol.*  
420 85:3269-3278. 2004.
- 421 5. Gerlach P, Malet H, Cusack S, Reguera J. Structural Insights into Bunyavirus  
422 Replication and Its Regulation by the vRNA Promoter. *Cell.* 161:1267–79. 2015.
- 423 6. Arragain B, Durieux Trouillette Q, Baudin F, Provaznik J, Azevedo N, Cusack S,  
424 Schoehn G, Malet H. Structural snapshots of La Crosse virus polymerase reveal  
425 the mechanisms underlying Peribunyaviridae replication and transcription. *Nat*  
426 *Commun.* 13:902. 2022.
- 427 7. Barr JN, Rodgers JW, Wertz GW. The Bunyamwera virus mRNA transcription  
428 signal resides within both the 3' and the 5' terminal regions and allows ambisense  
429 transcription from a model RNA segment. *J Virol.* 79:12602-7. 2005.
- 430 8. Ariza A, Tanner SJ, Walter CT, Dent KC, Shepherd DA, Wu W, Matthews SV,  
431 Hiscox JA, Green TJ, Luo M, Elliott RM, Fooks AR, Ashcroft AE, Stonehouse NJ,  
432 Ranson NA, Barr JN, Edwards TA. Nucleocapsid protein structures from  
433 orthobunyaviruses reveal insight into ribonucleoprotein architecture and RNA  
434 polymerization. *Nucleic Acids Res.* 41:5912-26. 2013.



- 435 9. Reguera J, Malet H, Weber F, Cusack S. Structural basis for encapsidation of  
436 genomic RNA by La Crosse Orthobunyavirus nucleoprotein. *Proc Natl Acad Sci*.  
437 110:7246–51. 2013.
- 438 10. Matsumoto Y, Ohta K, Kolakofsky D, Nishio M. A minigenome study of Hazara  
439 nairovirus genomic promoters. *J Virol*. 93:e02118-18. 2019.
- 440 11. Ren F, Zhou M, Deng F, Wang H, Ning YJ. Combinatorial minigenome systems  
441 for emerging Banyangviruses reveal viral reassortment potential and importance of  
442 a protruding nucleotide in genome “panhandle” for promoter activity and  
443 reassortment. *Front Microbiol*. 11:599. 2020.
- 444 12. Weidmann M, Avsic-Zupanc T, Bino S, Bouloy M, Burt F, Chinikar S, et al.  
445 Biosafety standards for working with Crimean-Congo hemorrhagic fever virus. *J*  
446 *Gen Virol*. 97:2799–808. 2016.
- 447 13. Dai S, Deng F, Wang H, Ning Y. Crimean-Congo hemorrhagic fever virus: current  
448 advances and future prospects of antiviral strategies. *Viruses*. 13:1195. 2021.
- 449 14. Krasteva S, Jara M, Frias-De-Diego A, Machado G. Nairobi sheep disease virus: a  
450 historical and epidemiological perspective. *Front Vet Sci*. 7:419. 2020.
- 451 15. Banerjee AK. 5'-terminal cap structure in eucaryotic messenger ribonucleic acids.  
452 *Microbiol Rev*. 44:175-205. 1980.
- 453 16. Habjan M, Andersson I, Klingström J, Schümann M, Martin A, Zimmermann P,  
454 Wagner V, Pichlmair A, Schneider U, Mühlberger E, Mirazimi A, Weber F.  
455 Processing of genome 5' termini as a strategy of negative-strand RNA viruses to  
456 avoid RIG-I-dependent interferon induction. *PLoS ONE*. 3:e2032. 2008.
- 457 17. Obijeski JF, Bishop DH, Palmer EL, Murphy FA. Segmented genome and  
458 nucleocapsid of La Crosse virus. *J Virol*. 20:664–75. 1976.

- 459 18. Garcin D, Kolakofsky D. Tacaribe arenavirus RNA synthesis in vitro is primer  
460 dependent and suggests an unusual model for the initiation of genome replication.  
461 *J Virol* 66:1370-6. 1992.
- 462 19. Deflubé LR, Cressey TN, Hume AJ, Olejnik J, Haddock E, Feldmann F, Ebihara H,  
463 Fearn R, Mühlberger E. Ebolavirus polymerase uses an unconventional genome  
464 replication mechanism. *Proc Natl Acad Sci U S A*. 116:8535-8543. 2019.
- 465 20. Shareef AM, Ludeke B, Jordan P, Deval J, Fearn R. Comparison of RNA  
466 synthesis initiation properties of non-segmented negative strand RNA virus  
467 polymerases. *PLOS Pathog*. 17:e1010151. 2021.
- 468 21. Garcin D, Lezzi M, Dobbs M, Elliott RM, Schmaljohn C, Kang CY, Kolakofsky D.  
469 The 5' ends of Hantaan virus (Bunyaviridae) RNAs suggest a prime-and-realign  
470 mechanism for the initiation of RNA synthesis. *J Virol*. 69:5754-62. 1995.
- 471 22. Patterson JL, Holloway B, Kolakofsky D. La Crosse virions contain a  
472 primer-stimulated RNA polymerase and a methylated cap-dependent endonuclease.  
473 *J Virol*. 52:215–22. 1984.
- 474 23. Jeeva S, Cheng E, Ganaie SS, Mir MA. Crimean-Congo hemorrhagic fever virus  
475 nucleocapsid protein augments mRNA translation. *J Virol*. 91:e00636-17. 2017.
- 476 24. Jin H, Elliott RM. Non-viral sequences at the 5' ends of Dugbe nairovirus S  
477 mRNAs. *J Gen Virol*. 74:2293–7. 1993.
- 478 25. Ferron F, Weber F, de la Torre JC, Reguera J. Transcription and replication  
479 mechanisms of Bunyaviridae and Arenaviridae L proteins. *Virus Res*. 234:118–34.  
480 2017.
- 481 26. Barnwal B, Karlberg H, Mirazimi A, Tan YJ. The Non-structural protein of  
482 Crimean-Congo hemorrhagic fever virus disrupts the mitochondrial membrane  
483 potential and induces apoptosis. *J Biol Chem*. 291:582-92. 2016.

- 484 27. Mega DF, Fuller J, Álvarez-Rodríguez B, Mankouri J, Hewson R, Barr JN.  
485 Mutagenic analysis of Hazara nairovirus nontranslated regions during single- and  
486 multistep growth identifies both attenuating and functionally critical sequences for  
487 virus replication. *J Virol.* 94:e00357-20. 2020.
- 488 28. Freitas N, Enguehard M, Denolly S, Levy C, Neveu G, Lerolle S, Devignot S,  
489 Weber F, Bergeron E, Legros V, Cosset FL. The interplays between  
490 Crimean-Congo hemorrhagic fever virus (CCHFV) M segment-encoded accessory  
491 proteins and structural proteins promote virus assembly and infectivity. *PLOS*  
492 *Pathog.* 16:e1008850. 2020.
- 493 29. Mishra AK, Moyer CL, Abelson DM, Deer DJ, El Omari K, Duman R, Lobel L,  
494 Lutwama JJ, Dye JM, Wagner A, Chandran K, Cross RW, Geisbert TW, Zeitlin L,  
495 Bornholdt ZA, McLellan JS. Structure and characterization of Crimean-Congo  
496 hemorrhagic fever virus GP38. *J Virol.* 94:e02005-19. 2020.
- 497 30. Krogh A, Larsson B, von Heijne G, Sonnhammer ELL. Predicting transmembrane  
498 protein topology with a hidden markov model: application to complete genomes. *J*  
499 *Mol Biol.* 305:567–80. 2001.
- 500 31. Teufel F, Almagro Armenteros JJ, Johansen AR, Gíslason MH, Pihl SI, Tsirigos  
501 KD, et al. SignalP 6.0 predicts all five types of signal peptides using protein  
502 language models. *Nat Biotechnol.* doi: 10.1038/s41587-021-01156-3. 2022.
- 503 32. Precision mapping of the human O-GalNAc glycoproteome through SimpleCell  
504 technology. *EMBO J.* 32:1478–88. 2013.

505

506

507

508 **Figure legends**

509 **Figure 1. Construction of the promoter list of bunyaviruses**

510 A schematic diagram of the promoter list construction. The promoter structure of 590  
511 species of bunyaviruses registered in the ICTV list was analyzed. The genome length,  
512 promoter structure, G:C and A:U complementarity counts, and each nt (A, U, G, and C)  
513 count in the 40 nts of the promoters in the genomic ends are listed in Supplementary  
514 Table 2. The calculations were performed in an Excel file using automatic calculations  
515 for the promoter region as described in Supplementary Table 1.

516

517 **Figure 2. Characteristics of bunyavirus replication promoters in the M segment**

518 (A) Sequence conservation and nt complementarity counts in the promoters of five  
519 major virus families. Sequence conservation was analyzed using the sequence logo  
520 generator WebLogo. The percentages of G:C and A:U complementarity in the promoter  
521 region (1 to 40 nts) among virus species in each family are shown as a bar graph. Virus  
522 species in the following families were examined: *Peribunyaviridae* (n = 56),  
523 *Phenuiviridae* (n = 47), *Tospoviridae* (n = 19), *Hantaviridae* (n = 24), and *Nairoviridae*  
524 (n = 20). (B) Characteristics of promoters. Virus promoters were divided into those that  
525 start with A and those that start with U, and further characterized according to the  
526 presence of a 3-nt or 2-nt repeat. *Phenuiviridae* and *Tospoviridae* possess an ambisense  
527 genome.

528

529 **Figure 3. Counts of G:C and A:U complementarity, and each nt (A, U, G, and C)**  
530 **in the promoters**

531 (A and B) The counts of G:C and A:U complementarity (A) and each nt (B) in the 40  
532 nts of the promoters. Bars represent the means and standard deviations. Virus species in  
533 the following families were examined: *Peribunyaviridae* (n = 56), *Phenuiviridae* (n =  
534 47), *Tospoviridae* (n = 19), *Hantaviridae* (n = 24), and *Nairoviridae* (n = 20). \*\*p <  
535 0.01, \*p < 0.05, two-tailed unpaired Student's *t*-test (G:C vs. A:U).

536

537 **Figure 4. Genome length of bunyaviruses**

538 (A) The total genome length (L segment + M segment + S segment) of each virus  
539 family. (B) The lengths of the L, M, and S segments in each virus family. Bars represent  
540 the means and standard deviations. Virus species in the following families were  
541 examined: *Peribunyaviridae* (n = 56), *Phenuiviridae* (n = 47), *Tospoviridae* (n = 19),  
542 *Hantaviridae* (n = 24), and *Nairoviridae* (n = 20). \*\*p < 0.01, one-way ANOVA  
543 followed by Tukey's test, \*\*\* p < 0.01, in comparison to the other four families.

544

545 **Figure 5. Genome length of virus species in the family *Nairoviridae***

546 (A) Genome length of each segment of nairovirus sequences (5'-UCUC---GAGA-3')  
547 registered in the NCBI Refseq database. Bars represent the precise sequence length of  
548 each virus species. CCHFV and NSDV are shown in red and yellow. (B) Schematic  
549 diagram of GPC encoded in the M segment of nairoviruses. DUGV: Dugbe virus,  
550 TFLV: Tofla virus, ERVEV: Erve virus.

551

552 **Supplementary Figure 1. Construction of the list of promoters in *Arenaviridae***

553 (A) The genome of the family *Arenaviridae* possesses an unpaired nt at the genomic  
554 end that forms an overhang. To account for this overhang in the analysis, sequences that  
555 showed complementarity between +1 and +4 within 0- to 2-nt shifts in the 5' or 3' ends  
556 of all arenavirus genomes were selected. In total, 25 arenavirus promoter sequences, as  
557 listed in Supplementary Table 2, were included (2 tri-segmented antennaviruses, and 23  
558 di-segmented mammarenaviruses). (B) The conservation of the extreme 38 nts (without  
559 the overhang) in each of the 5' and 3' ends of the L and S segments among the 23  
560 mammarenavirus species was analyzed. (C) The counts of G:C and A:U  
561 complementarity, and A, U, G, and C in the first 40 nts (for 38 to 39 nts in the opposite  
562 strand of 2-nt and 1-nt overhangs, respectively) of the L and S segments were  
563 determined. G:C complementarity was significantly higher than A:U complementarity

564 in both segments (\*\*p < 0.01, one-way ANOVA followed by Tukey's test), unlike in  
565 tri-segmented bunyaviruses. (D) A limited number of mammarenavirus species  
566 possessed an overhang nt in the database. It should be noted that many sequences of  
567 *Arenaviridae* genomes annotated in the NCBI database did not have overhanging  
568 genomic ends.

569

570 **Supplementary Figure 2. Characteristics of the replication promoters of the L, M,  
571 and S segments of *Peribunyaviridae*, *Phenuiviridae*, and *Tospoviridae***

572 Sequence conservation was analyzed using the sequence logo generator WebLogo. The  
573 percentages of G:C and A:U complementarity in the promoter region (1 to 40 nts)  
574 among virus species in each family are shown as a bar graph. Virus species in the  
575 following families were examined: *Peribunyaviridae* (n = 56), *Phenuiviridae* (n = 47),  
576 and *Tospoviridae* (n = 19).

577

578 **Supplementary Figure 3. Characteristics of the replication promoters of the L, M,  
579 and S segments of *Hantaviridae* and *Nairoviridae***

580 Sequence conservation was analyzed using the sequence logo generator Weblogo. The  
581 percentages of G:C and A:U complementarity in the promoter region (1 to 40 nts)  
582 among virus species in each family are shown as a bar graph. Virus species in the  
583 following families were examined: *Hantaviridae* (n = 24) and *Nairoviridae* (n = 20).

584

585 **Supplementary Table 1. The automatic promotor calculator**

586 **Supplementary Table 2. Promoter list**

587 **Supplementary Table 3. *Nairoviridae* genome length**

→ **5'- and 3'-complementarity (\*) analysis of 40 nts (Supplementary Table 1)**

```
5' -AGUAGUGUACUCCUACAUAUAGAAAAUUUAAAAUAUAAC
    ***** ***** ** * * * * *
3' -UCAUCACACGAGGAUGUAUUCUUUUAACAUGAAAAACUU
```

**Promoter list of *Bunyvirales* (Supplementary Table 2)**

Genome length / Promoter structure / G:C and A:U complementarity counts / Each nts counts

**Tri-segment**

*Arenaviridae* (2)  
*Cruliviridae* (3)  
*Hantaviridae* (24)  
*Mypoviridae* (1)  
*Nairoviridae* (20)  
*Peribunyaviridae* (56)  
*Phasmaviridae* (2)  
*Phenuiviridae* (47)  
*Tospoviridae* (19)  
*Wupedeviridae* (1)

**Multi-segment**

*Fimoviridae* (17)  
*Phenuiviridae* (14)  
*Arenaviridae* (23)

**Figure 1**

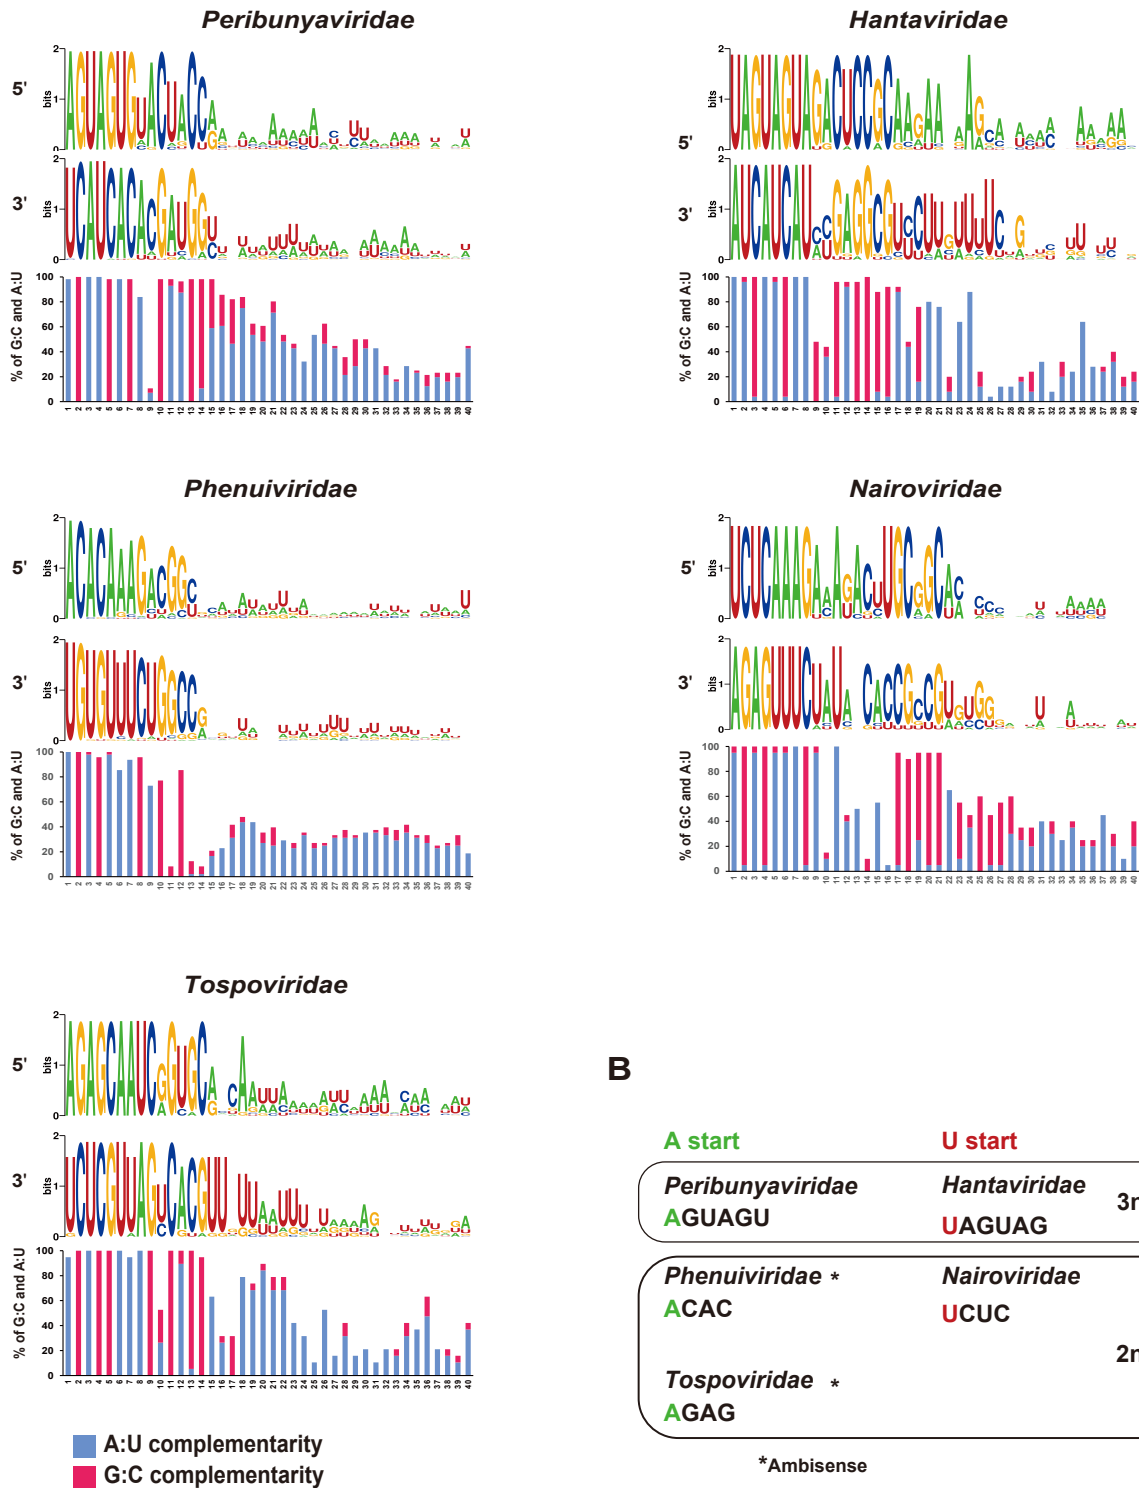

**Figure 2**



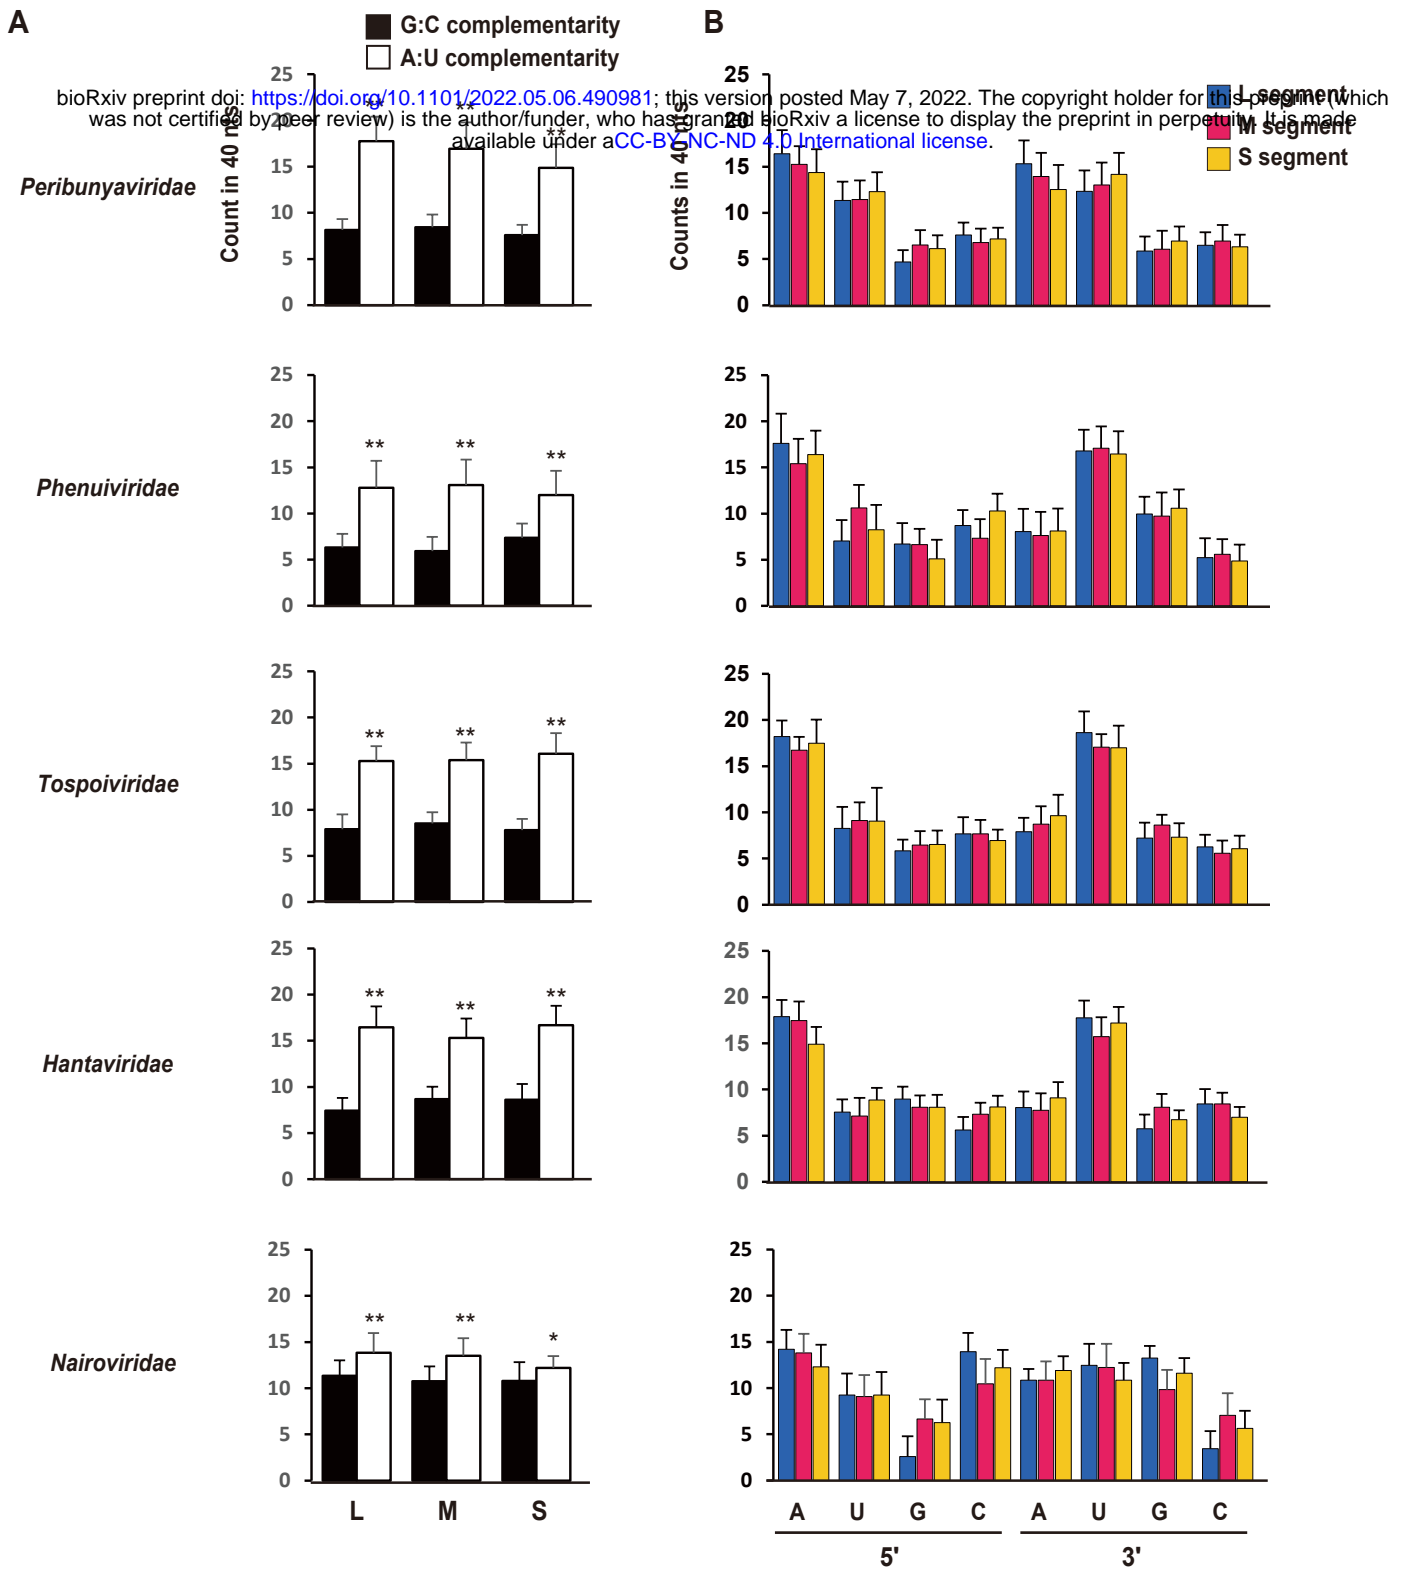

**Figure 3**

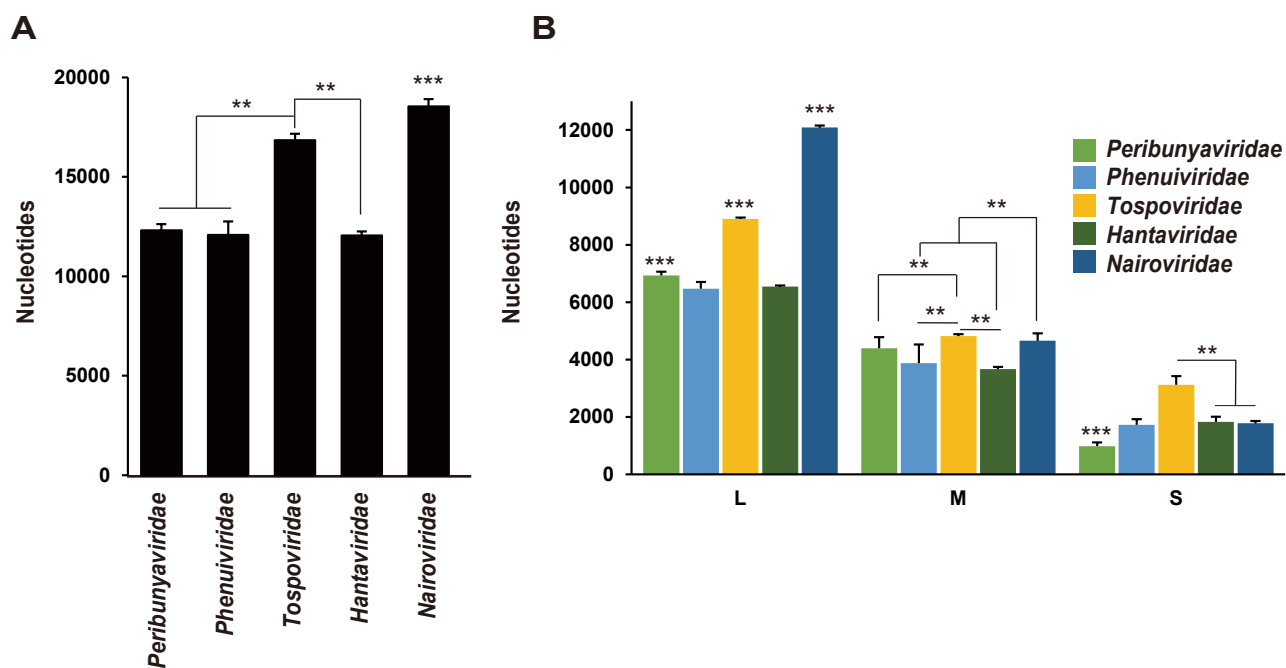

Figure 4

**A**

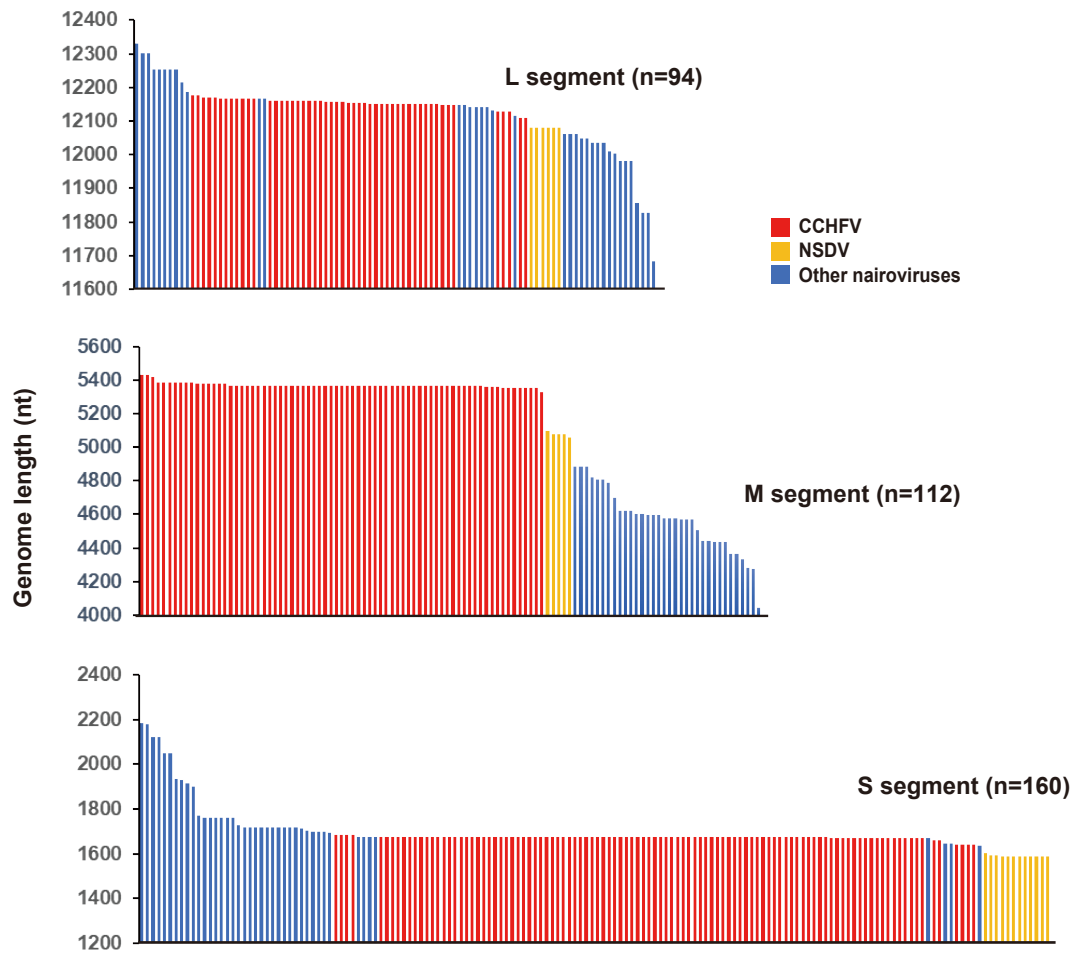

**B**

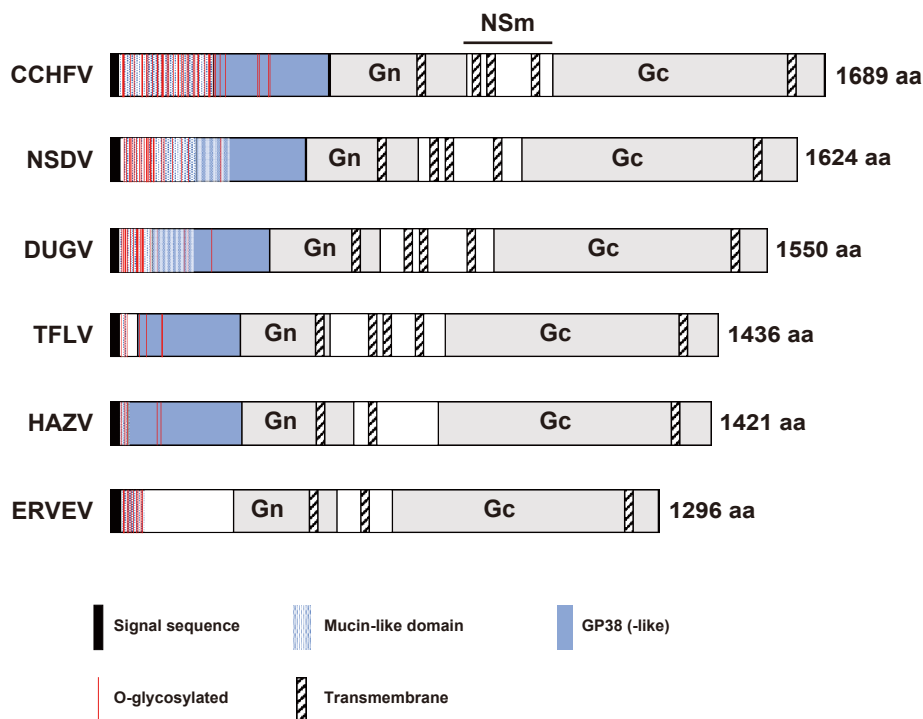

**Figure 5**

**A****Sequences of 46 mammarenaviruses registered on the ICTV list**

- 5'- and 3'- complementarity (C) analysis of 41 units
- 5'- and 3'- overhang analysis (underlined)

5' - CGCACCGGGGAUCCUAGGCAUUUUUGGUUGCGCAAUCA  
 \*\*\*\*\* \* \*\*\*\*\* \*\* \*  
 3' - GCGUGUACCUAGGAUCCGAUAACCUAACGCGAAACGAA  
 +01234

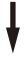**Data selection for analysis**

1. Complement +1 to +4 nts
2. Complement +1 to +4 nts within 2 nt overhang

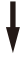

Complete list of promoters (Supplementary Table 1)

**D****Non-overhang**

5' - CGCA  
 3' - GCGU

**5'-G overhang**

5' - GCGCA  
 3' - GCGU

Lassa virus  
 Guaranito virus  
 Junín virus  
 Machupo virus  
 Sabiá virus  
 Oliveros virus

**B**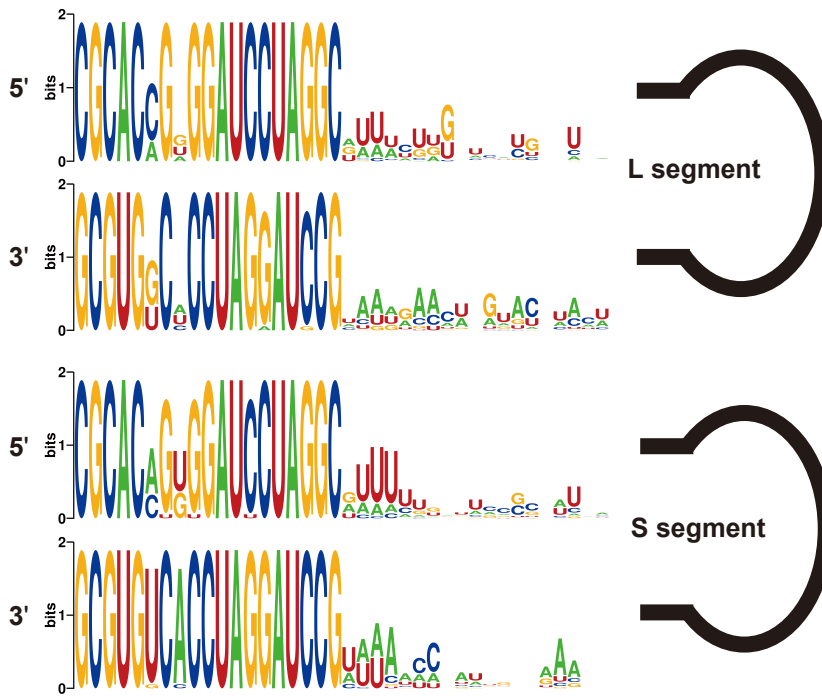**C**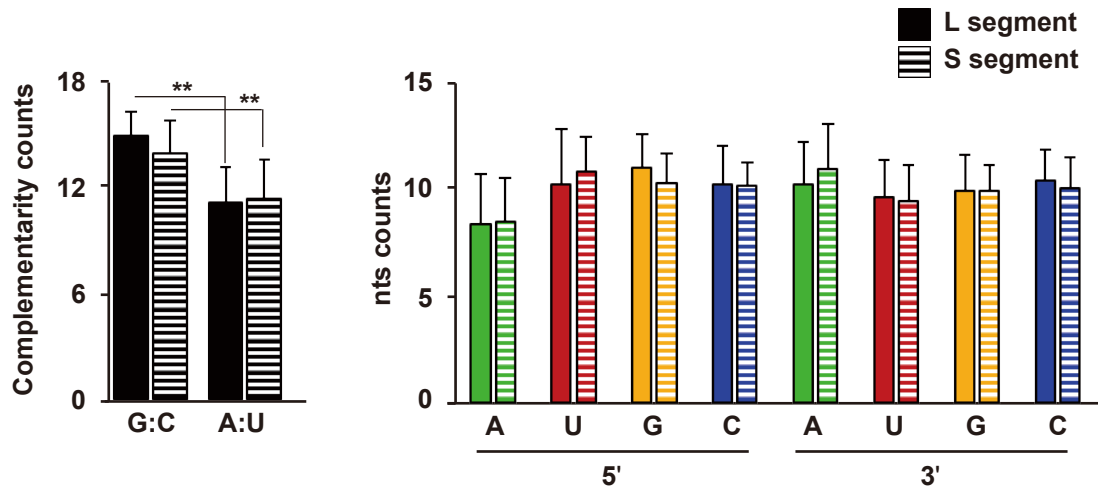

Supplementary Figure 1

*Peribunyaviridae*

*Phenuiviridae*

*Tospoviridae*

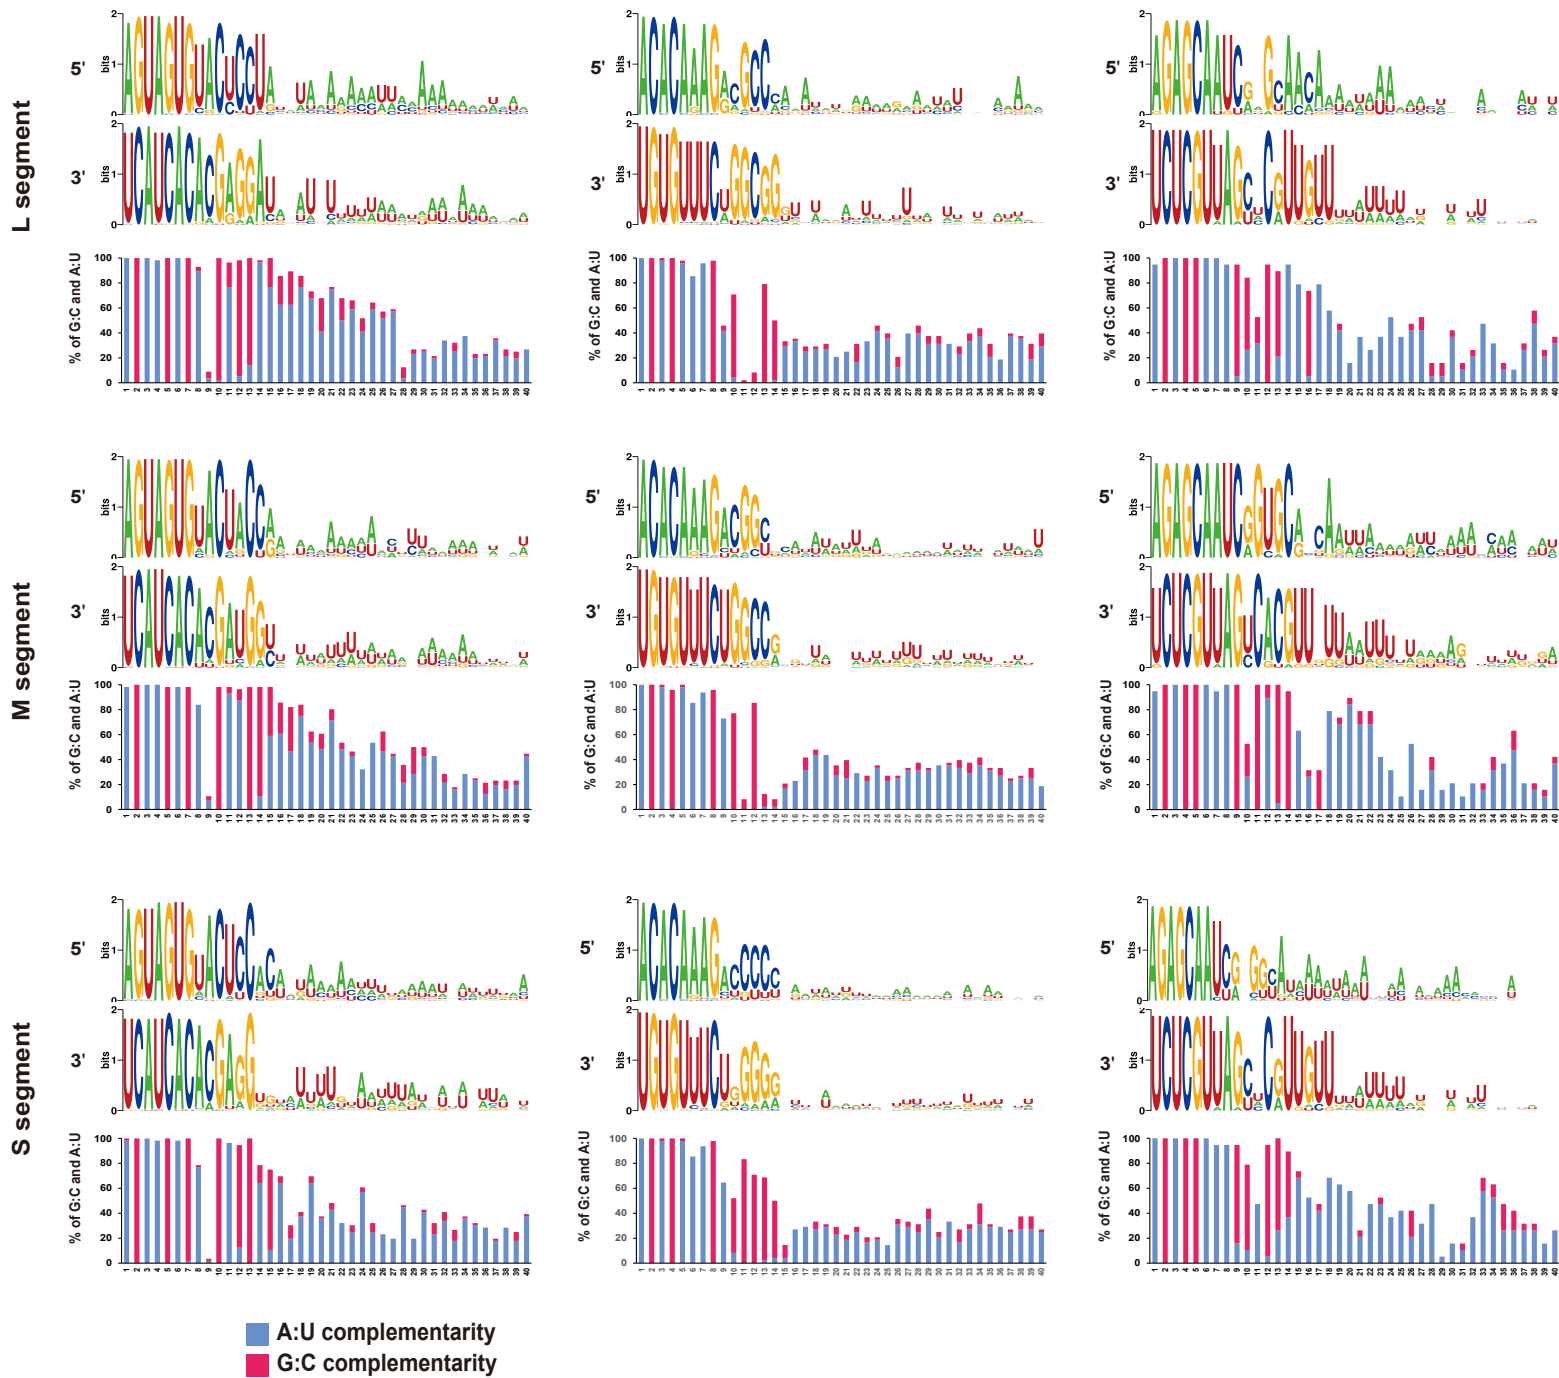

Supplementary Figure 2

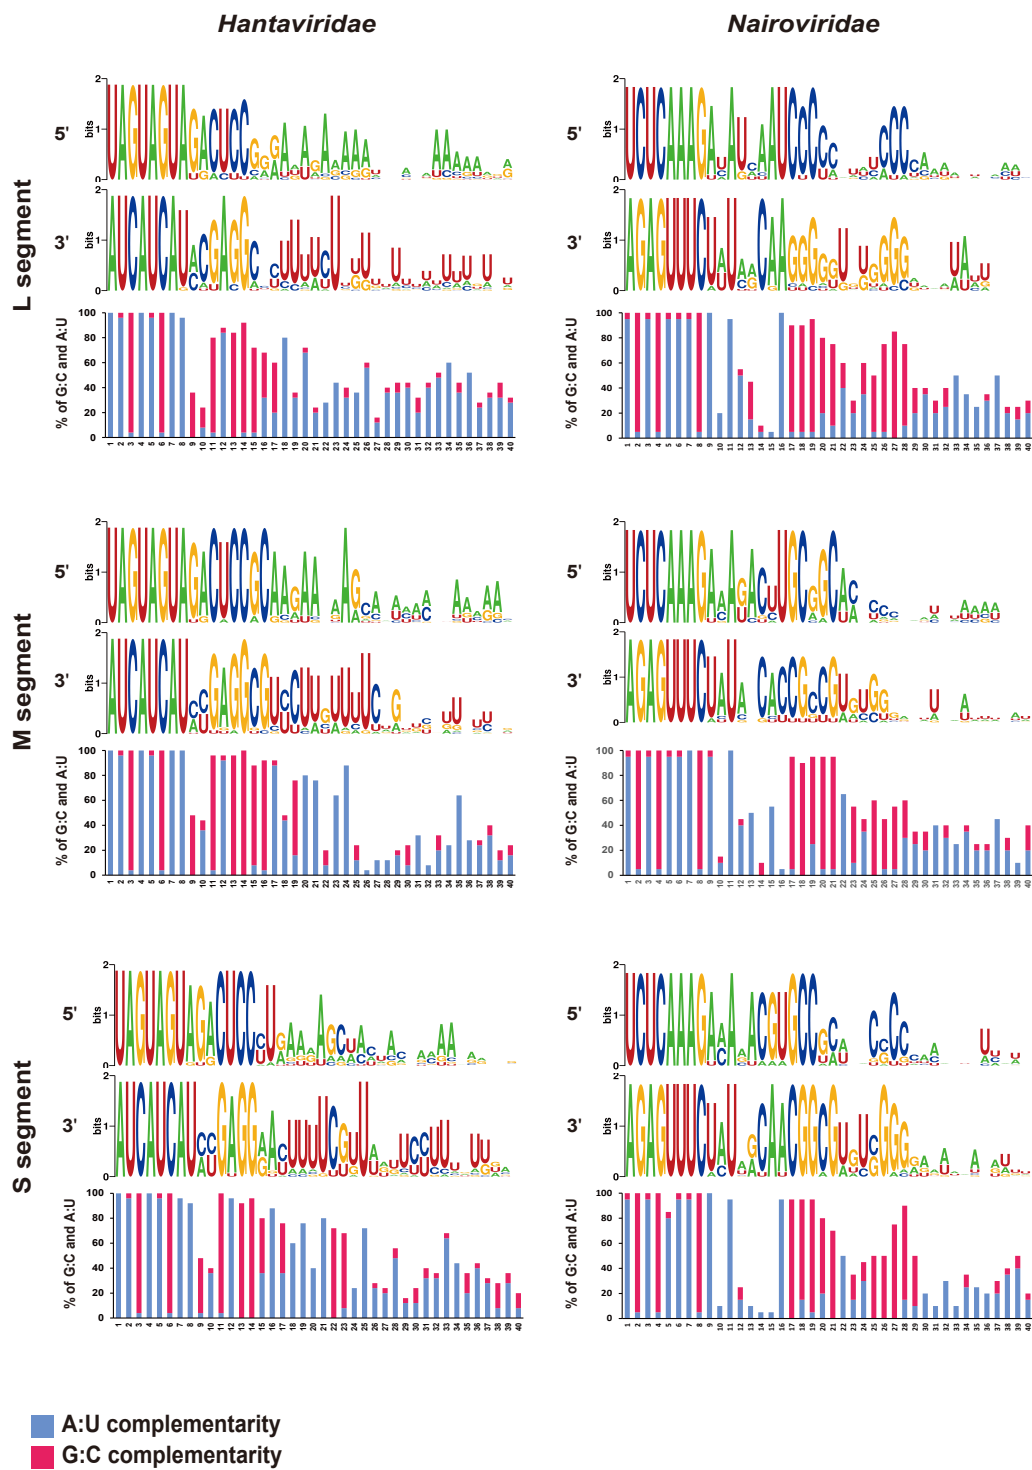

Supplementary Figure 3
